# Supplementary material for: Anti-donor T cell responses are equivalent between elderly and non-elderly kidney transplant recipients
Source: Research Square preprint supplement (doi:10.21203/rs.3.rs-1300860/v1), 2022-02-04
Supplement: Supplementary file 1 [file 780526271bc441b8069d2527.docx]

**Table 2:** Post-transplant complications of elderly patients versus non-elderly recipients

|  | Elderly  (n = 18) | Non-elderly  (n = 49) | P-value |
| --- | --- | --- | --- |
| CMV, n (%) | 12 (66.7) | 22 (44.9) | 0.11 |
| UTI, n (%) | 8 (44.4) | 16 (32.7) | 0.37 |
| TCMR, n (%) | 1 (5.6) | 2 (4.1) | 0.80 |
| dnDSA, n (%) | 2 (11.1) | 3 (6.1) | 0.49 |
| CVD, n (%) | 3 (16.7) | 3 (6.1) | 0.18 |
| Malignancy, n (%) | 3 (16.7) | 7 (10.5) | 0.31 |

CMV, cytomegalovirus antigenemia; UTI, urinary tract infection; TCMR, T cell mediated rejection; dnDSA, *de novo* donor-specific anti-human leukocyte antigen antibody; CVD, cardiovascular disease
