# Supplementary material for: Anti-donor T cell responses are equivalent between elderly and non-elderly kidney transplant recipients
Source: Research Square preprint supplement (doi:10.21203/rs.3.rs-1300860/v1), 2022-02-04
Supplement: Supplementary file 2 [file f827bc9480f444a55e50c1a5.docx]

**Table 1:** Baseline characteristics of elderly patients versus non-elderly recipients

|  | Elderly  (n = 18) | Non-elderly  (n = 49) | P-value |
| --- | --- | --- | --- |
| Recipient age, years (median, IQR) | 66.5 (63.8–70.3) | 42 (36.5–53.0) | < 0.0001 |
| Recipient gender, male/female | 13 / 5 | 30 / 19 | 0.41 |
| Primary disease, n (%) |  |  | 0.18 |
| CGN | 3 (16.7) | 8 (16.3) |  |
| DMN | 6 (33.3) | 11 (22.5) |  |
| IgAN | 1 (5.6) | 9 (18.4) |  |
| Nephrosclerosis | 3 (16.7) | 3 (6.1) |  |
| PKD | 2 (11.1) | 1 (2.0) |  |
| Others | 3 (16.7) | 17 (34.7) |  |
| Body mass index, kg/m2 (median, IQR) | 22.5 (21.0–24.1) | 20.8 (19.4–23.8) | 0.25 |
| Modality of RRT, n (%) |  |  | 0.99 |
| Pre-emptive | 7 (38.9) | 19 (38.8) |  |
| Dialysis | 11 (61.1) | 30 (61.2) |  |
| Dialysis period, years (median, IQR) | 0.6 (0−2.7) | 0.4 (0−1.4) | 0.43 |
| Donor age, years (median, IQR) | 60.5 (55.0–70.8) | 57 (48.0–63.5) | 0.10 |
| Donor sex, male/female | 4 / 14 | 20 / 29 | 0.16 |
| Donor type, living/deceased | 16 / 2 | 46 /3 | 0.49 |
| Relationship of living donor, n (%) |  |  | 0.0028 |
| Child | 1 (6.3) | 1 (2.2) |  |
| Parents | 0 (0) | 23 (50.0) |  |
| Sibling | 2 (12.5) | 6 (13.0) |  |
| Spouse | 13 (81.3) | 16 (34.8) |  |
| HLA allele MM |  |  |  |
| A (0:1:2) | 2: 8: 8 | 5: 34: 10 | 0.13 |
| B (0:1:2) | 2: 1: 15 | 5: 27: 17 | 0.0008 |
| DRB1 (0:1:2) | 2: 4: 12 | 8: 28: 13 | 0.0096 |
| ABO-incompatible, n (%) | 8 (44.4) | 18 (36.7) | 0.57 |
| Preformed DSA, n (%) | 2 (3.0) | 0 (0) | 0.018 |
| Observation period, years (median, IQR) | 3.5 (2.4−6.0) | 5.0 (2.4−9.0) | 0.19 |

CGN, chronic glomerulonephritis; DMN, diabetic nephropathy; IgAN, immunoglobulin A nephropathy; PKD, polycystic kidney disease; others, other diseases including focal glomerular sclerosis, lupus nephritis, gestational toxicosis, gouty nephropathy, and other unknown diseases; RRT, renal replacement therapy; MM, mismatch; DSA, donor-specific anti-human leukocyte antigen antibody
